# Supplementary material
Source: publisher figshare collection journal article supplement (https://acs.figshare.com/ndownloader/files/10269015)
Supplement: Supplementary file 1 [file 10269015]

## Supporting Information

# Detection of cyanobacteria in eutrophic water using a portable electrocoagulator and NanoGene assay

<sup>1</sup> Eun-Hee Lee, <sup>2,\*</sup> Beelee Chua, <sup>1,\*</sup> Ahjeong Son

<sup>1</sup> Department of Environmental Science and Engineering, Ewha Womans University, Seoul, Republic of Korea

<sup>2</sup> School of Electrical Engineering, Korea University, Seoul, Republic of Korea

\*Corresponding Author, Beelee Chua: Present address. 145 Anam-ro, Seongbuk-gu, Korea University, Seoul, 02841, Republic of Korea; E-mail. chuabeelee@gmail.com; Phone. +82 (2) 3290-4639

\*Corresponding Author, Ahjeong Son: Present address. 52 Ewhayeodae-gil, Seodaemun-gu, Ewha Womans University, Seoul, 03760, Republic of Korea; E-mail. ahjeong.son@gmail.com; Phone. +82 (2) 3277-3339; Fax. +82 (2) 3277-3275

### Summary

- Number of pages: 9
- Number of figures: 4
- Number of tables: 4

## 1. Calibration curve: Cell density versus absorbance for laboratory samples

Using a counting chamber and 100  $\mu\text{L}$  of laboratory sample, the number of *Microcystis aeruginosa* cells in one well was counted via light microscope. The number of wells and conversion factor (10) was multiplied to obtain the cell density ( $\text{cells}\cdot\text{mL}^{-1}$ ) in triplicates.

Cell density ( $\text{cells}\cdot\text{mL}^{-1}$ ) = cell numbers in 1 well  $\times$  total numbers of well  $\times$  10 (conversion factor)

The laboratory sample's absorbance (optical density) at 680 nm was also obtained via SpectraMax M2 spectrofluorometer.

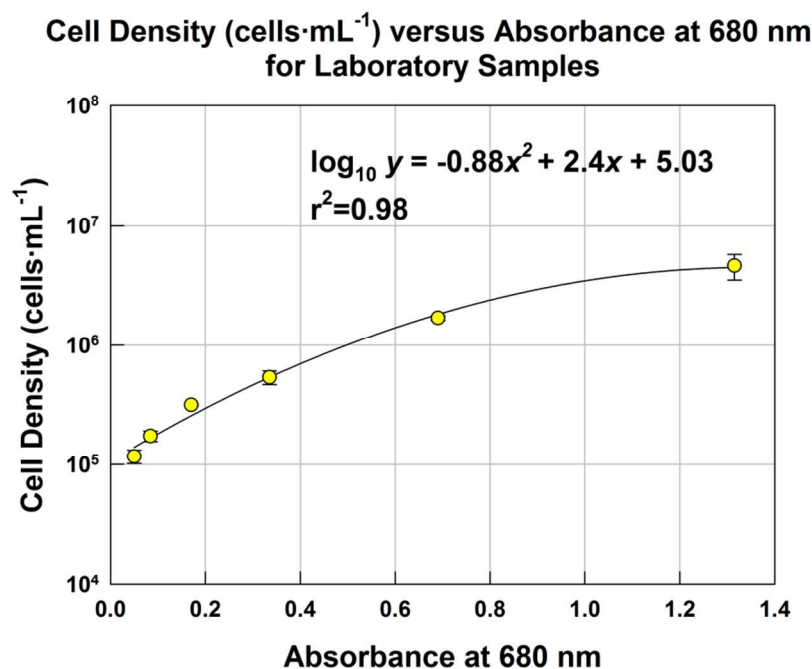

**Figure S1.** Cell density ( $\text{cells}\cdot\text{mL}^{-1}$ ) versus absorbance at 680 nm for laboratory samples.

## 2a. Cell density for environmental samples.

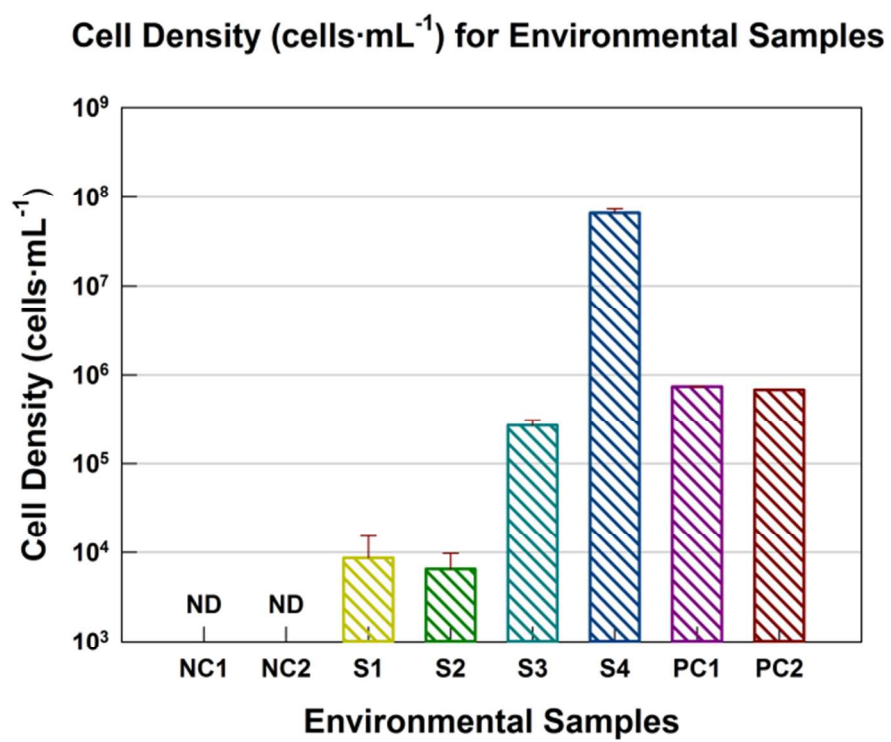

**Figure S2a.** Cell density (cells·mL<sup>-1</sup>) for environmental samples.

## 2b. Chlorophyll-a concentration for environmental samples

Ten mL of environmental sample was first filtered by a glass fiber filter. The filtered environmental sample was then transferred to 50 mL centrifugal tube and 10 mL of 90% purity acetone was added. Chlorophyll-a was extracted via sonication for 20 min. After centrifugation at 2400 rpm, the supernatant was subjected to absorbance measurement by a SpectraMax M2 spectrofluorometer at 664 nm and 750 nm. The chlorophyll-a concentration ( $\mu\text{g}\cdot\text{mL}^{-1}$ ) was calculated based on prior reference<sup>1</sup>. The measurement was performed in duplicate.

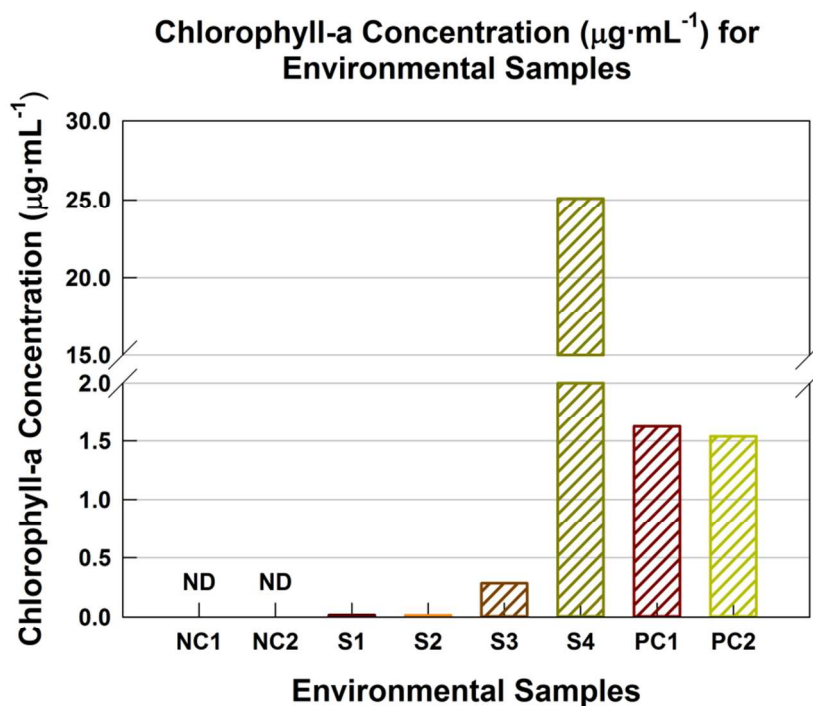

**Figure S2b.** Chlorophyll-*a* concentration ( $\mu\text{g}\cdot\text{mL}^{-1}$ ) for environmental samples.

### 3. Calibration curve for NanoGene assay

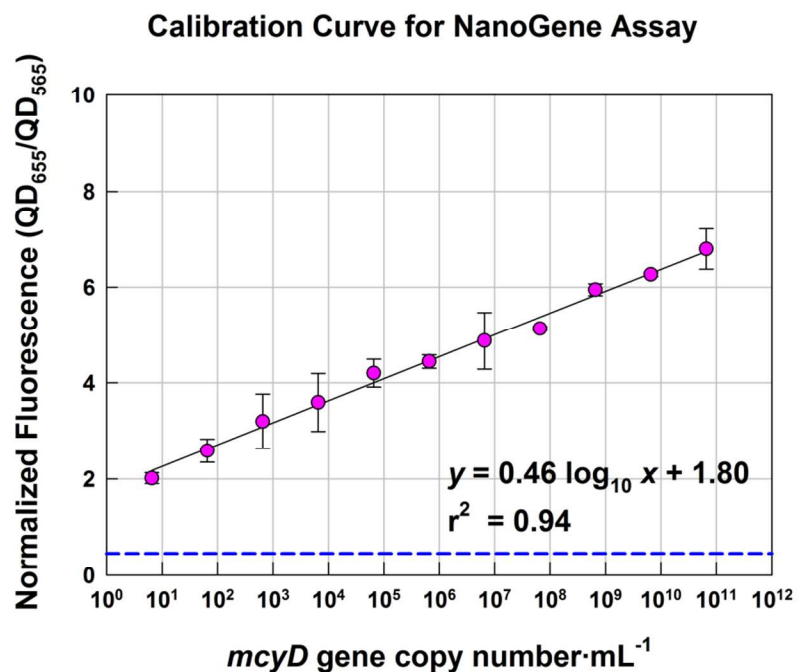

**Figure S3.** Calibration curve of NanoGene assay. Normalized fluorescence versus *mcyD* gene copy number. Dotted blue line represents the normalized fluorescence value of template (negative control) in absence of DNA for the NanoGene assay. Symbols and error bars indicate the mean and standard deviations of biological triplicates.

**Table S1.** Water quality data of environmental test samples.<sup>1</sup>

| Sample | Location                  | Latitude/<br>Longitude | Water<br>temperature (°C) | pH  | DO<br>(mg/L) | BOD<br>(mg/L) | COD<br>(mg/L) | SS<br>(mg/L) | T-N<br>(mg/L) | T-P<br>(mg/L) |
|--------|---------------------------|------------------------|---------------------------|-----|--------------|---------------|---------------|--------------|---------------|---------------|
| NC1    | Seocho, Seoul             | 37.47/<br>127.03       | 29.2                      | 7.9 | 7.9          | 1.5           | 5.0           | 6.8          | 5.02          | 0.317         |
| NC2    | Anyang, Gyeonggi province | 37.39/<br>126.97       | 28.4                      | 7.6 | 4.5          | 3.8           | 7.7           | 5.6          | 7.73          | 0.040         |
| S1     | Gangdong, Seoul           | 37.54/<br>127.11       | 28.2                      | 7.9 | 8.3          | 2.0           | 4.7           | 5.5          | 2.37          | 0.036         |
| S2     | Seongdong, Seoul          | 37.53/<br>127.03       | 29.1                      | 8.1 | 6.7          | 0.8           | 3.6           | 3.4          | 2.44          | 0.031         |
| S3     | Yongsan, Seoul            | 37.52/<br>126.96       | 29.6                      | 7.4 | 4.2          | 1.5           | 4.3           | 6.8          | 3.45          | 0.084         |
| S4     | Yeongdeungpo, Seoul       | 37.55/<br>126.89       | 30                        | 7.7 | 5.1          | 1.4           | 5.4           | 11.6         | 3.19          | 0.103         |

1. DO represents dissolved oxygen; BOD indicates biochemical oxygen demand; COD represents chemical oxygen demand; SS refers to suspended solids; T-N represents total nitrogen; T-P indicates total phosphorus.

**Table S2.** Statistical analysis (t-test) between electrocoagulation and centrifugation with reference to Figure 4.

| <b>Data</b>                                   |                   | <b>Statistical results</b> |
|-----------------------------------------------|-------------------|----------------------------|
| Figure 4a                                     | Op duration (s)   | <i>p</i> -value            |
|                                               | 0                 | NA <sup>a</sup>            |
| Pre-concentration efficiency (%)              | 30                | 0.000142                   |
|                                               | 60                | 0.0797                     |
|                                               | 90                | 0.139                      |
|                                               | 120               | 0.021                      |
|                                               | 180               | 0.342                      |
|                                               | 300               | 0.176                      |
| Figure 4b                                     | Op duration (s)   | <i>p</i> -value            |
|                                               | 0                 | NA                         |
| Dry cell weight (g-DCW·L <sup>-1</sup> )      | 30                | 0.250                      |
|                                               | 60                | 0.152                      |
|                                               | 90                | 0.435                      |
|                                               | 120               | 0.374                      |
|                                               | 180               | 1.000                      |
|                                               | 300               | 1.000                      |
| Figure 4c                                     | Cell density      | <i>p</i> -value            |
|                                               | $1.7 \times 10^5$ | 0.02780                    |
| Pre-concentration efficiency (%)              | $2.2 \times 10^5$ | 0.01610                    |
|                                               | $3.2 \times 10^5$ | 0.91300                    |
|                                               | $8.6 \times 10^5$ | 0.11200                    |
|                                               | $2.5 \times 10^6$ | 0.00019                    |
|                                               | $4.1 \times 10^6$ | 0.00207                    |
| Figure 4d                                     | Cell density      | <i>p</i> -value            |
|                                               | $1.7 \times 10^5$ | 0.795                      |
| Dry cell weight (g-DCW·L <sup>-1</sup> )      | $2.2 \times 10^5$ | 0.435                      |
|                                               | $3.2 \times 10^5$ | 0.519                      |
|                                               | $8.6 \times 10^5$ | 0.422                      |
|                                               | $2.5 \times 10^6$ | 0.089                      |
|                                               | $4.1 \times 10^6$ | 0.400                      |
| Figure 4e                                     | Cell density      | <i>p</i> -value            |
|                                               | $3.2 \times 10^5$ | 0.622                      |
| Normalized fluorescence                       | $8.6 \times 10^5$ | 0.116                      |
|                                               | $2.5 \times 10^6$ | 0.400                      |
| Figure 4f                                     | Cell density      | <i>p</i> -value            |
|                                               | $3.2 \times 10^5$ | 0.597                      |
| <i>mcvD</i> gene copy number·mL <sup>-1</sup> | $8.6 \times 10^5$ | 0.172                      |
|                                               | $2.5 \times 10^6$ | 0.380                      |

<sup>a</sup> NA stands for not applicable.

**Table S3.** Statistical analysis (t-test) between electrocoagulation and centrifugation with reference to Figure 6.

|                                          | <b>Data</b> | <b>Statistical results</b> |
|------------------------------------------|-------------|----------------------------|
| Figure 6a & 6b                           | Sample      | <i>p</i> -value            |
|                                          | NC1         | NA <sup>a</sup>            |
| Pre-concentration efficiency (%)         | NC2         | NA                         |
|                                          | S1          | NA                         |
|                                          | S2          | NA                         |
|                                          | S3          | 0.0000402                  |
|                                          | S4          | 0.248                      |
|                                          | PC1         | 0.863                      |
|                                          | PC2         | 0.700                      |
| Figure 6c & 6d                           | Sample      | <i>p</i> -value            |
|                                          | NC1         | NA                         |
| Dry cell weight (g-DCW·L <sup>-1</sup> ) | NC2         | NA                         |
|                                          | S1          | NA                         |
|                                          | S2          | NA                         |
|                                          | S3          | 0.000562                   |
|                                          | S4          | 0.048                      |
|                                          | PC1         | 0.270                      |
|                                          | PC2         | 0.330                      |

<sup>a</sup> NA stands for not applicable.

**Table S4.** Statistical analysis (t-test) of zeta potential before (raw sample) and after treatments of electrocoagulation and centrifugation with reference to Table 2.

|                     | <b>Data</b> | <b>Statistical results</b><br>( <i>p</i> -value) | <b>Statistical results</b><br>( <i>p</i> -value) |
|---------------------|-------------|--------------------------------------------------|--------------------------------------------------|
| Table 2             | Sample      | Electrocoagulation                               | Centrifugation                                   |
| Zeta potential (mV) | NC1         | NA <sup>a</sup>                                  | NA                                               |
|                     | NC2         | NA                                               | NA                                               |
|                     | S1          | NA                                               | NA                                               |
|                     | S2          | NA                                               | NA                                               |
|                     | S3          | 0.008                                            | 0.333                                            |
|                     | S4          | 0.146                                            | 0.117                                            |
|                     | PC1         | 0.00029                                          | 0.00695                                          |
|                     | PC2         | 0.00436                                          | 0.00144                                          |

<sup>a</sup> NA stands for not applicable.



## References

1. Standard methods for examination of water and wastewater, 1998, 20<sup>th</sup> edition, American Public Health Association, Washington, D.C.
2. Water information system, Ministry of environment in Korea, <http://water.nier.go.kr/> (accessed date March 2016)
